# Supplementary material for: Tannic Acid Improves Renal Function Recovery after Renal Warm Ischemia–Reperfusion in a Rat Model
Source: PubMed Central journal article supplement (PMC7175177; doi:10.3390/biom10030439), 2020-03-12
Supplement: biomolecules-10-00439-s001.pdf [file biomolecules-10-00439-s001.pdf]

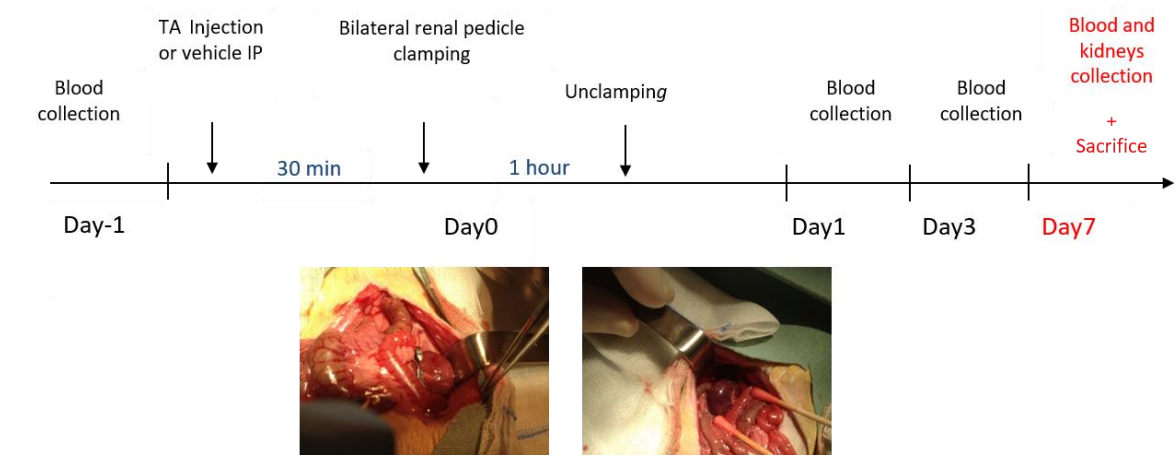

**Supplementary Figure S1.** Schematic representation of renal bilateral warm ischemia-reperfusion rat model

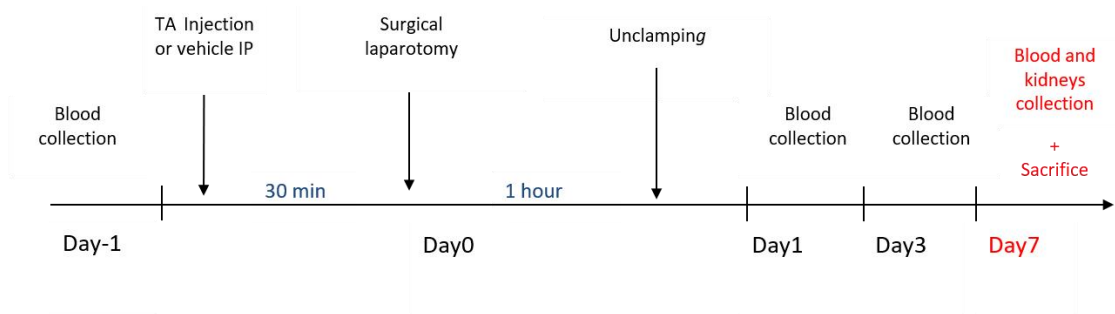

**Cold preservation in SCOT15 of kidney graft for 6h**

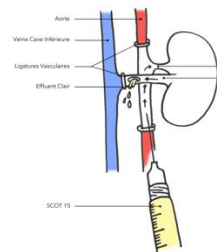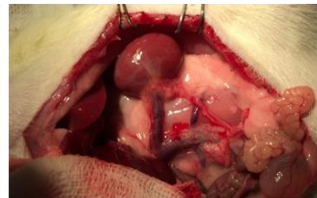

**Supplementary Figure S2.** Schematic representation of cold ischemia-reperfusion rat model: renal allotransplantation in recipient

*Cytotoxicity assay*

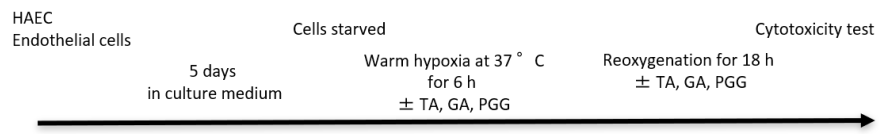

*Cell ROX assay*

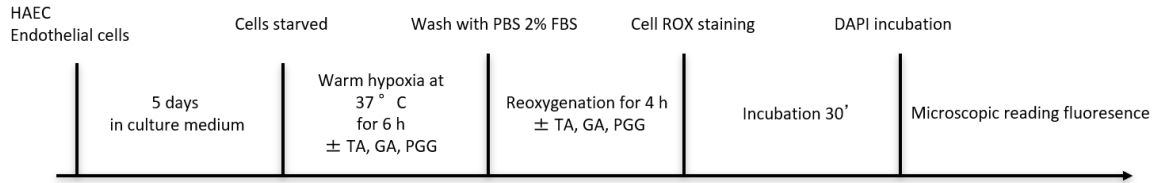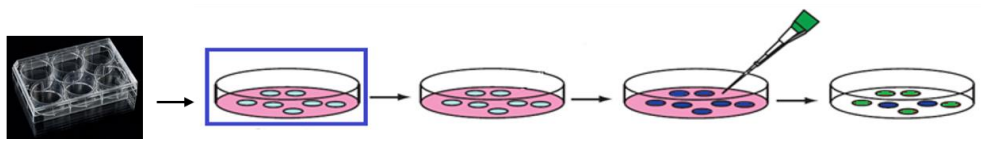

**Supplementary Figure S3.** Schematic representation of in vitro cytotoxicity and Cell Rox assays
